# Supplementary material for: Distinct African Swine Fever Virus Shedding in Wild Boar Infected with Virulent and Attenuated Isolates
Source: Vaccines (Basel). 2020 Dec 16;8(4):767. doi: 10.3390/vaccines8040767 (PMC7765575; doi:10.3390/vaccines8040767)
Supplement: Supplementary file 1 [file vaccines-08-00767-s001.pdf]

## Supplementary Material

**Table S1.** ASFV DNA detection in tissues determined by real-time PCR in the inoculated and in-contact wild boar infected with the Lv17/WB/Rie1 ASFV isolate in the attenuated group or with Arm07 ASFV isolate in the virulent group.

| Tissue                   | Attenuated group                                    |                                                     | Virulent group                                      |                                                     |
|--------------------------|-----------------------------------------------------|-----------------------------------------------------|-----------------------------------------------------|-----------------------------------------------------|
|                          | Orally inoculated                                   | In-contact                                          | Intramuscularly inoculated                          | In-contact                                          |
|                          | Ct values of real-time PCR ( $\pm$ SD) <sup>1</sup> | Ct values of real-time PCR ( $\pm$ SD) <sup>1</sup> | Ct values of real-time PCR ( $\pm$ SD) <sup>1</sup> | Ct values of real-time PCR ( $\pm$ SD) <sup>1</sup> |
| Heart                    | 37 $\pm$ 5                                          | 37 $\pm$ 2                                          | 25 $\pm$ 7                                          | 23 $\pm$ 3                                          |
| Lung                     | 37 $\pm$ 5                                          | Neg                                                 | 22 $\pm$ 3                                          | 22 $\pm$ 2                                          |
| Kidney                   | 38 $\pm$ 5                                          | Neg                                                 | 24 $\pm$ 5                                          | 22 $\pm$ 2                                          |
| Liver                    | 38 $\pm$ 4                                          | Neg                                                 | 23 $\pm$ 7                                          | 20 $\pm$ 2                                          |
| Urinary bladder          | 37 $\pm$ 5                                          | Neg                                                 | 26 $\pm$ 6                                          | 26 $\pm$ 3                                          |
| Spleen                   | 36 $\pm$ 6                                          | 39 $\pm$ 2                                          | 22 $\pm$ 6                                          | 20 $\pm$ 4                                          |
| Lymph nodes <sup>2</sup> | 37 $\pm$ 1                                          | 39 $\pm$ 1                                          | 25 $\pm$ 5                                          | 23 $\pm$ 2                                          |
| Tonsil                   | no data                                             | no data                                             | 25 $\pm$ 8                                          | 22 $\pm$ 7                                          |
| Bone Marrow              | 38 $\pm$ 6                                          | Neg                                                 | 24 $\pm$ 8                                          | 22 $\pm$ 4                                          |
| Brain                    | 38 $\pm$ 5                                          | Neg                                                 | 25 $\pm$ 7                                          | 23 $\pm$ 2                                          |

<sup>1</sup>Mean cycle threshold ( $\pm$  standard deviation) in quantitative PCR of the indicated tissue. <sup>2</sup>Lymph nodes: These CT values were obtained from a pool of eight different lymph nodes: renal, mediastinal, retropharyngeal, mesenteric, preescapular, gastrohepatic, inguinal and mandibular lymph nodes.

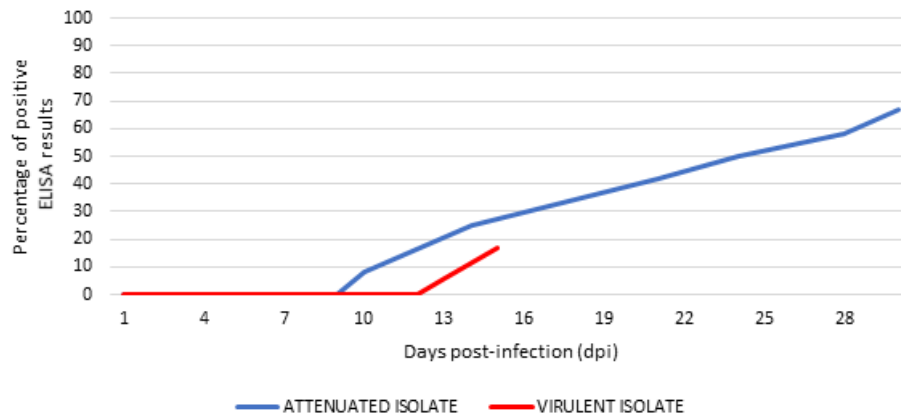

**Figure S1.** Percentage of positive animals for antibody detection in serum samples determined by commercial ELISA kit for the detection of p72 ASFV antigen (Ingenasa-Ingenzim PPA Compac K3; Ingenasa, Madrid, Spain) in the attenuated group (blue line) and in the virulent group (red line).
